# Supplementary material for: Impact of RNA Signatures on pCR and Survival after 12-Week Neoadjuvant Pertuzumab plus Trastuzumab with or without Paclitaxel in the WSG-ADAPT HER2+/HR− Trial
Source: Oxford University Press journal article supplement (doi:10.1158/1078-0432.ccr-22-1587), 2022-11-28
Supplement: ccr-22-1587_supplementary_figure_s1_suppfs1.docx [file ccr-22-1587_supplementary_figure_s1_suppfs1.docx]

Supplementary Fig. 1. CONSORT diagram.
