# Supplementary material for: Impact of RNA Signatures on pCR and Survival after 12-Week Neoadjuvant Pertuzumab plus Trastuzumab with or without Paclitaxel in the WSG-ADAPT HER2+/HR− Trial
Source: Oxford University Press journal article supplement (doi:10.1158/1078-0432.ccr-22-1587), 2022-11-28
Supplement: ccr-22-1587_supplementary_figure_s2_suppfs2.docx [file ccr-22-1587_supplementary_figure_s2_suppfs2.docx]

| **A** | **B** |
| --- | --- |

Supplementary Fig. 2. Associations between RNA signatures and ypT0/is ypN0. Data are shown for combined analysis of Arms A and B (A) and for the neoadjuvant chemotherapy-free Arm A only (B). OR are expressed in terms of standardized variables.
