# Supplementary material for: Impact of RNA Signatures on pCR and Survival after 12-Week Neoadjuvant Pertuzumab plus Trastuzumab with or without Paclitaxel in the WSG-ADAPT HER2+/HR− Trial
Source: Oxford University Press journal article supplement (doi:10.1158/1078-0432.ccr-22-1587), 2022-11-28
Supplement: ccr-22-1587_supplementary_table_s3_suppts3.docx [file ccr-22-1587_supplementary_table_s3_suppts3.docx]

Supplementary Table 3. Associations between the genes in ER signaling signature and pCR. Data are shown for combined analysis of Arms A and B (A) and for the neoadjuvant chemotherapy-free Arm A only (B). OR are expressed in terms of standardized variables.

| Gene | Arms A and B combined | | | Neoadjuvant chemotherapy-free Arm A | | |
| --- | --- | --- | --- | --- | --- | --- |
| **OR** | **95%CI** | **p-value** | **OR** | **95%CI** | **p-value** |
| *ADCY9* | 0.55 | 0.35, 0.86 | 0.009 | 0.54 | 0.27, 1.07 | 0.079 |
| *ADD1* | 0.71 | 0.47, 1.05 | 0.084 | 1.12 | 0.60, 2.09 | 0.724 |
| *ANXA9* | 1.32 | 0.90, 1.94 | 0.163 | 1.58 | 0.91, 2.75 | 0.108 |
| *CDCA8* | 0.62 | 0.41, 0.93 | 0.022 | 0.40 | 0.20, 0.79 | 0.008 |
| *DDX39A* | 1.01 | 0.69, 1.46 | 0.968 | 0.65 | 0.33, 1.25 | 0.192 |
| *DNAJC12* | 0.61 | 0.41, 0.92 | 0.018 | 0.91 | 0.51, 1.60 | 0.734 |
| *EIF3B* | 0.88 | 0.60, 1.28 | 0.499 | 0.66 | 0.37, 1.18 | 0.164 |
| *ELOVL2* | 0.81 | 0.55, 1.19 | 0.282 | 0.70 | 0.40, 1.22 | 0.207 |
| *ESR1* | 0.83 | 0.56, 1.21 | 0.329 | 0.77 | 0.44, 1.32 | 0.333 |
| *IFT140* | 1.00 | 0.69, 1.45 | 0.999 | 1.34 | 0.77, 2.34 | 0.300 |
| *MAPT* | 0.95 | 0.65, 1.39 | 0.794 | 1.22 | 0.72, 2.07 | 0.454 |
| *NAT1* | 0.83 | 0.56, 1.22 | 0.334 | 1.02 | 0.63, 1.65 | 0.944 |
| *PFDN2* | 0.80 | 0.54, 1.19 | 0.264 | 0.63 | 0.33, 1.21 | 0.164 |
| *PGR* | 0.88 | 0.60, 1.29 | 0.508 | 1.06 | 0.64, 1.75 | 0.826 |
| *PTGER3* | 0.97 | 0.66, 1.41 | 0.869 | 0.99 | 0.57, 1.71 | 0.961 |
| *SCUBE2* | 1.08 | 0.74, 1.57 | 0.696 | 1.16 | 0.67, 1.99 | 0.605 |
| *TBC1D9* | 1.00 | 0.69, 1.46 | 0.991 | 1.50 | 0.87, 2.57 | 0.143 |
| *TCEAL1* | 0.80 | 0.55, 1.18 | 0.256 | 0.98 | 0.56, 1.72 | 0.933 |
| *TFF1* | 0.90 | 0.61, 1.31 | 0.567 | 1.32 | 0.77, 2.24 | 0.312 |
| *WDR77* | 0.62 | 0.41, 0.92 | 0.018 | 0.62 | 0.33, 1.16 | 0.131 |
| *SERBP1* | 1.16 | 0.79, 1.71 | 0.446 | 0.90 | 0.44, 1.87 | 0.786 |
| *ITPR1* | 0.85 | 0.58, 1.25 | 0.417 | 1.08 | 0.66, 1.78 | 0.755 |
| *TLE3* | 0.96 | 0.66, 1.39 | 0.809 | 1.10 | 0.65, 1.85 | 0.736 |
| *SYTL4* | 0.95 | 0.65, 1.38 | 0.782 | 1.28 | 0.74, 2.20 | 0.379 |
| *BORCS7* | 0.65 | 0.44, 0.96 | 0.030 | 0.86 | 0.48, 1.51 | 0.590 |
| *SHMT2* | 0.95 | 0.65, 1.39 | 0.790 | 0.84 | 0.49, 1.44 | 0.525 |
| *HEMK1* | 1.05 | 0.72, 1.53 | 0.806 | 1.03 | 0.63, 1.69 | 0.910 |
