# Supplementary material for: Impact of RNA Signatures on pCR and Survival after 12-Week Neoadjuvant Pertuzumab plus Trastuzumab with or without Paclitaxel in the WSG-ADAPT HER2+/HR− Trial
Source: Oxford University Press journal article supplement (doi:10.1158/1078-0432.ccr-22-1587), 2022-11-28
Supplement: ccr-22-1587_supplementary_table_s6_suppts6.docx [file ccr-22-1587_supplementary_table_s6_suppts6.docx]

Supplementary Table 6. Multivariate logistic regression models for predicting pCR (ypT0/is ypN0).

| **Variable** | **Arms A and B combined** | | **Neoadjuvant chemotherapy-free Arm A** | |
| --- | --- | --- | --- | --- |
|  | **OR (95%CI)** | **p-value** | **OR (95%CI)** | **p-value** |
| *ERBB2* | 2.50 (1.49, 4.21) | 0.001 | 2.71 (1.25, 5.90) | 0.012 |
| ER signaling | 1.58 (1.02, 2.47) | 0.043 | 1.82 (0.98, 3.38) | 0.059 |
| *PTEN* | 0.59 (0.36, 0.97) | 0.036 | - | - |
| Age (≥50 vs <50 years) | 0.53 (0.22, 1.27) | 0.156 | 0.31 (0.10, 0.96) | 0.043 |
| Clinical lymph node status (N+ vs N0) | 0.34 (0.14, 0.82) | 0.016 | 0.24 (0.08, 0.75) | 0.015 |

Number of patients analyzed in Arms A and B combined: n=115; in neoadjuvant chemotherapy-free Arm A: n=78.
